# Supplementary material for: A Multi-Omics Protocol for Swine Feces to Elucidate Longitudinal Dynamics in Microbiome Structure and Function
Source: MDPI journal article supplement (doi:10.3390/microorganisms8121887), 2020-11-28
Supplement: s1 [file s1]

## Supplementary materials

**An integrated multi-omics protocol for swine feces reveals congruent longitudinal dynamics in microbiome structure and function**

# **A Multi-Omics Protocol for Swine Feces to Elucidate Longitudinal Dynamics in Microbiome Structure and Function**

Laurin Christopher Gierse <sup>1,†</sup>, Alexander Meene <sup>1,†</sup>, Daniel Schultz <sup>2</sup>, Theresa Schwaiger <sup>3</sup>, Claudia Karte <sup>3</sup>,  
Charlotte Schröder <sup>3</sup>, Haitao Wang <sup>1</sup>, Christine Wünsche <sup>1</sup>, Karen Methling <sup>2</sup>, Bernd Kreikemeyer <sup>4</sup>,  
Stephan Fuchs <sup>5</sup>, Jörg Bernhardt <sup>1</sup>, Dörte Becher <sup>1</sup>, Michael Lalk <sup>2</sup>, KoInfekt Study Group <sup>‡</sup>, Tim Urich <sup>1,\*</sup> and Katharina Riedel <sup>1,\*</sup>

<sup>1</sup> Institute of Microbiology, University of Greifswald, Felix-Hausdorff-Str. 8, 17489 Greifswald, Germany; laurin.gierse@uni-greifswald.de (L.G.); alexander.meene@uni-greifswald.de (A.M.); haitao.wang@uni-greifswald.de (H.W.), christine.wuensche@uni-greifswald.de (C.W.); joerg.bernhardt@uni-greifswald.de (J.B.); doerte.becher@uni-greifswald.de (D.B.)

<sup>2</sup> Institute of Biochemistry, University of Greifswald, Felix-Hausdorff-Str. 4, 17489 Greifswald, Germany; daniel.schultz@uni-greifswald.de (D.S.); methling@uni-greifswald.de (K.M.); lalk@uni-greifswald.de (M.L.)

<sup>3</sup> Friedrich-Loeffler-Institut, Greifswald-Insel Riems, Südufer 10, 17493 Greifswald, Germany; theresa.schwaiger@boehringer-ingelheim.com (T.S.); claudia.karte@fli.de (C.K.); charlotte.schroeder@fli.de (C.S.)

<sup>4</sup> Institute for Medical Microbiology, Virology and Hygiene, Rostock University Medical Centre, Schillingallee 70, 18055 Rostock, Germany; bernd.kreikemeyer@med.uni-rostock.de

<sup>5</sup> Division of Nosocomial Pathogens and Antibiotic Resistance, Robert Koch Institute Wernigerode, Burgstraße 37, 38855 Wernigerode, Germany; fuchss@rki.de

\* Correspondence: tim.urich@uni-greifswald.de (T.U.); riedela@uni-greifswald.de (K.R.); Tel.: +49-383-442-059-04 (T.U.); +49-383-442-059-00 (K.R.)

† These authors contributed equally to the work.

‡ Authors of the KoInfekt Study Group were listed in the Author Contributions

Received: 4 September 2020; Accepted: 27 November 2020; Published: 28 November 2020

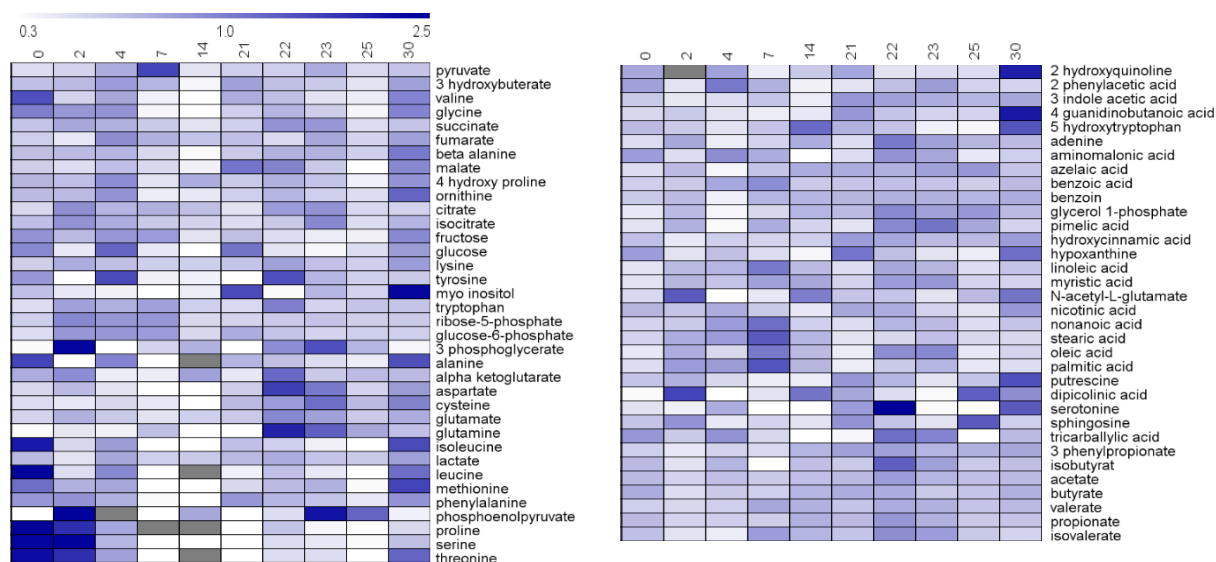

**Figure S1:** Heatmap displaying fold-change (mean amount day  $\times$  / mean amount over 30 days) of detected metabolites in pig feces by GC-MS and  $^1\text{H}$ -NMR spectroscopy. Dark blue color indicates an increased fold change of 2.5, while white color represents a decrease in the fold change to 0.3.

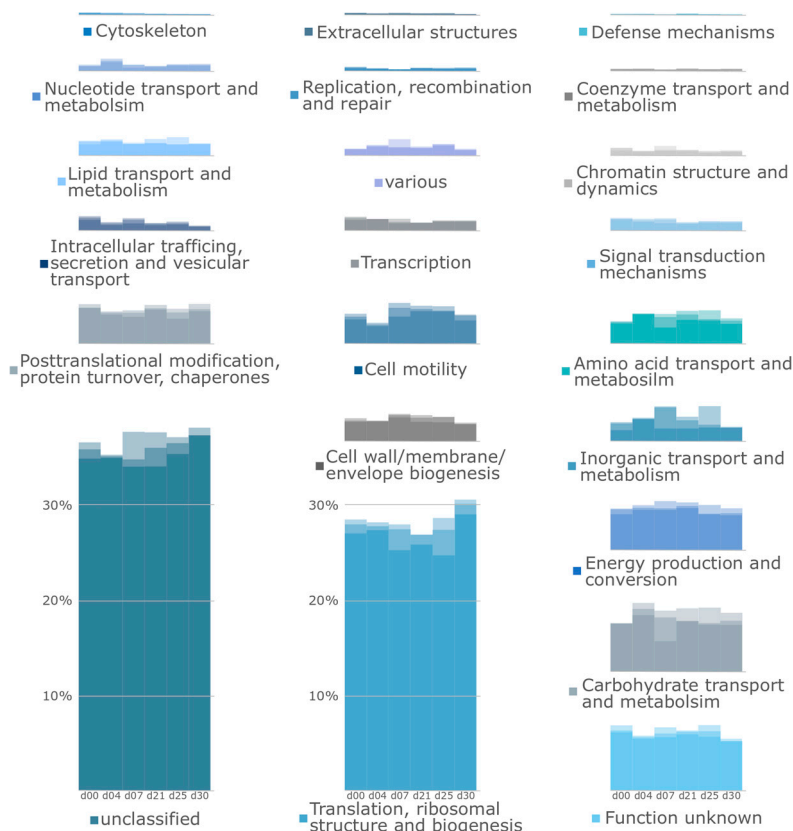

**Figure S2:** Assignment of identified PGs from swine feces to functional categories based on eggNOG ( $n = 3$  for sampling day 0, 7, 21, 25 and 30,  $n = 2$  for sampling day 4). For the functional analysis of the metaproteome all identified PGs were considered, including unclassified PGs and PGs with unknown function.



**Table S1:** Amount of isolated DNA from swine feces using different extraction protocols.

|                                      | tested extraction protocols for 16S rRNA sequencing |                   |
|--------------------------------------|-----------------------------------------------------|-------------------|
|                                      | TRIzol-based                                        | phenol-chloroform |
| amount DNA [ $\mu\text{g}$ /g feces] | 10.68                                               | 50.11             |
| SD [ $\mu\text{g}$ / g feces]        | 0.52                                                | 2.16              |

**Table S2:** Average protein concentration from swine feces after employing different protein extraction protocols.

|                                                  | tested extraction protocols for metaproteomics |               |                          |                  |
|--------------------------------------------------|------------------------------------------------|---------------|--------------------------|------------------|
|                                                  | sewage<br>sludge                               | urea/thiourea | heating and bead-beating | TRIzol-<br>based |
| amount protein [ $\mu\text{g}$ / $\mu\text{l}$ ] | 4.67                                           | 1.27          | 1.64                     | 5.76             |
| SD [ $\mu\text{g}$ / $\mu\text{l}$ ]             | 0.57                                           | 0.21          | 0.14                     | 0.39             |

**Table S3:** Total number of identified protein groups from swine feces at the corresponding sampling days.

|              | days after starting point |      |      |      |      |      |
|--------------|---------------------------|------|------|------|------|------|
|              | 0                         | 4*   | 7    | 21   | 25   | 30   |
| <b>Total</b> | 4560                      | 3454 | 3705 | 4230 | 3817 | 4348 |
| Bacteria     | 4062                      | 3194 | 3386 | 3924 | 3506 | 4055 |
| Eukaryota    | 403                       | 214  | 267  | 228  | 234  | 223  |
| Archaea      | 31                        | 11   | 4    | 10   | 12   | 20   |
| Various      | 52                        | 28   | 37   | 56   | 54   | 34   |
| Unclassified | 12                        | 7    | 11   | 12   | 11   | 16   |

\*only two biological replicates available
